# Supplementary material for: Graphene-based implantable neural electrodes for insect flight control
Source: Royal Society of Chemistry journal article supplement (doi:10.1039/d2tb00906d), 2022-01-01
Supplement: d2tb00906d2.pdf [file d2tb00906d2.pdf]

# Supplementary Materials for

## Graphene-based implantable neural electrodes for insect flight control

Jian Xiong<sup>1</sup>, Bin Zhang<sup>1</sup>, Andrew Balilonda<sup>2</sup>, Shengyuan Yang<sup>1\*</sup>, Kerui Li<sup>1</sup>, Qinghong Zhang<sup>3</sup>,  
Yaogang Li<sup>3</sup>, Hongzhi Wang<sup>1</sup> and Chengyi Hou<sup>1\*</sup>

<sup>1</sup> State Key Laboratory for Modification of Chemical Fibers and Polymer Materials, College of Materials Science and Engineering, Donghua University, Shanghai 201620, P. R. China

<sup>2</sup> Research Centre for Smart Wearable Technology, Institute of Textiles and Clothing, The Hong Kong Polytechnic University, Hung Hom, Kowloon, Hong Kong 999077, P. R. China.

<sup>3</sup> Engineering Research Center of Advanced Glasses Manufacturing Technology, College of Materials Science and Engineering, Donghua University, 201620, P. R. China

\* Corresponding authors (emails: [cmseysy@dhu.edu.cn](mailto:cmseysy@dhu.edu.cn) and [hcy@dhu.edu.cn](mailto:hcy@dhu.edu.cn))

### The PDF file includes:

Fig. S1. FTIR and Raman characterization of PGF electrodes

Fig. S2. SEM images of silver wire, gold wire and PGF electrodes.

Fig. S3. Calculation method of CSC and GSA

Fig. S4 and S5. Stability testing of silver wire, gold wire and PGF electrodes

Note S1. The calculation of CSC of electrodes

### Other Supplementary Material for this manuscript includes the following:

Movie S1 (.mp4 format). Electrically stimulated insect flight

## FTIR and Raman characterization of PGF electrodes

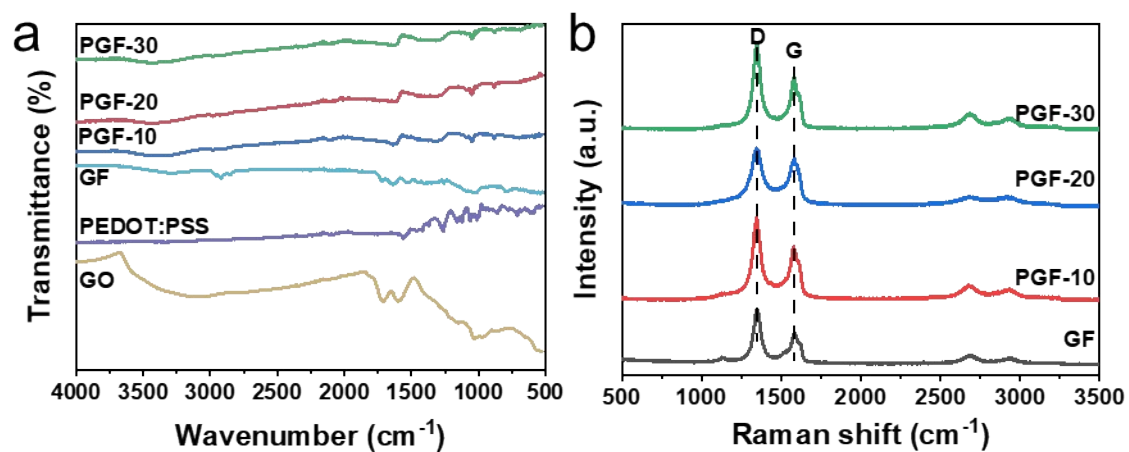

**Figure S1.** The (a) FTIR and (b) Raman spectra of the PEDOT:PSS, GO and PGF, respectively.

**SEM images of silver wire, gold wire and PGF electrodes.**

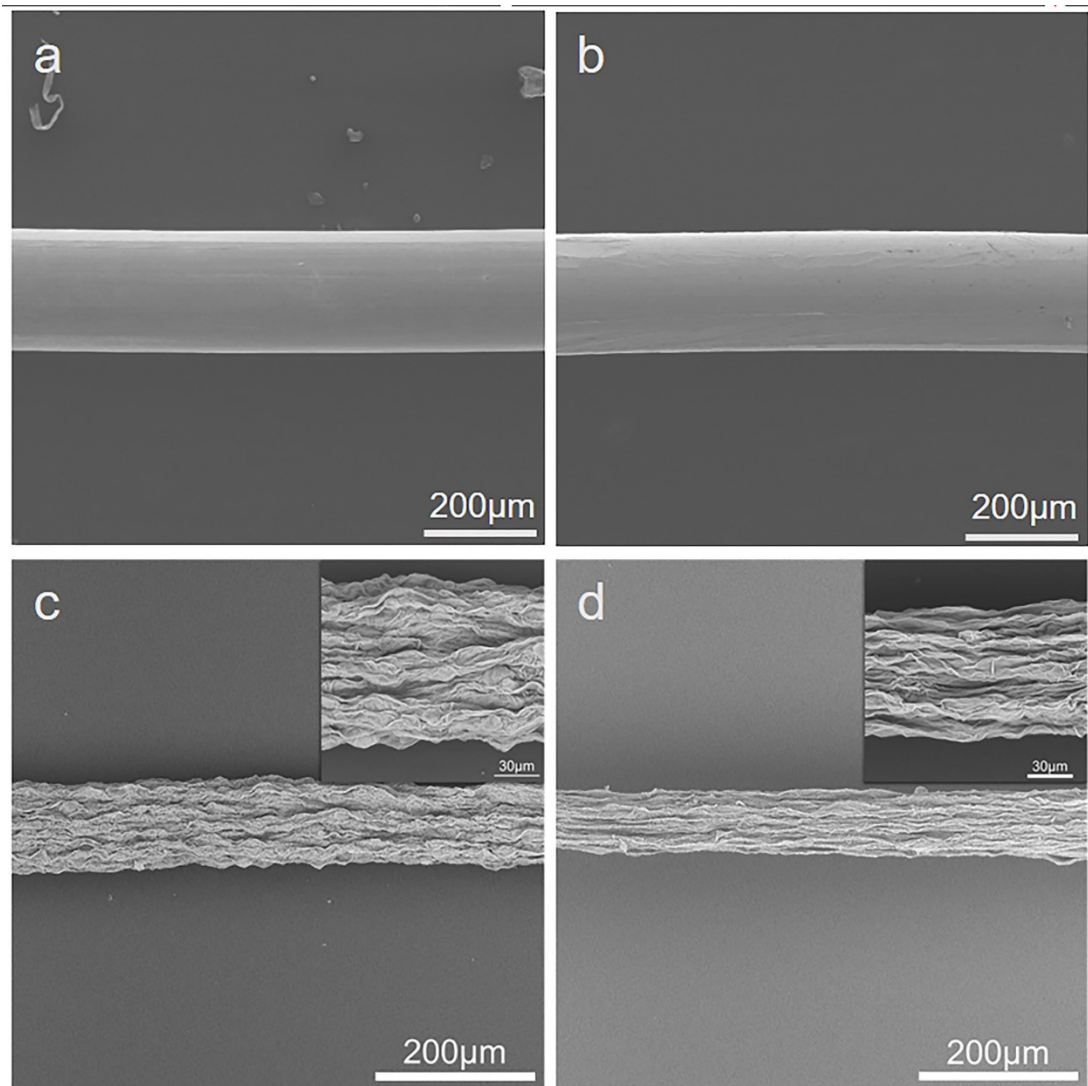

**Figure S2.** (a-d) SEM images of silver wire, gold wire, PGF-10 and PGF-30, respectively. The scale bar is 200 μm, the inset with a scale bar of 30 μm.

### Calculation procedure of CSC and GSA

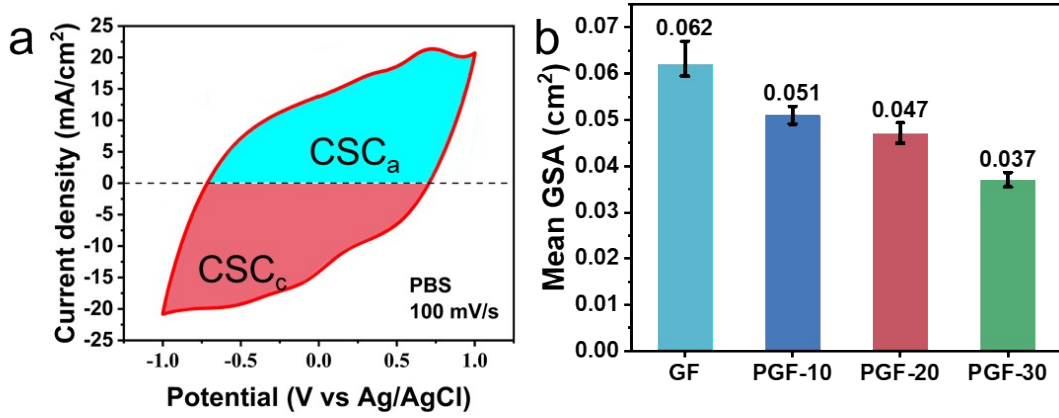

**Figure S3.** (a) An example of cyclic voltammetry (CV) with 100 mV/s scan rate and denoted cathodal and anodal charge storage capacity calculation. (b) The mean GSA of the GF, PGF-10, PGF-20, PGF-30, respectively.

### Note S1. The calculation procedure for CSC of electrode

$$CSC = \frac{Q_a + Q_c}{GSA \cdot k} \quad (1)$$

$$GSA = \left(\frac{\pi D}{2}\right)^2 + \pi D l \quad (2)$$

$$Q_a = \int_0^{V_2} I(v) dv \quad (3)$$

$$Q_c = \left| \int_{V_1}^0 I(v) dv \right| \quad (4)$$

where  $Q_a$  and  $Q_c$  are the charge storage capacity of the electrode's anode and cathode in mC, respectively,  $k$  is the scan rate in V/s,  $GSA$  is the cross-sectional area of the electrode in cm<sup>2</sup>,  $V_1$  and  $V_2$  are the lower and upper limits of the hydration windows of the electrochemical test in V, respectively, the  $D$  represents diameter of fiber, the  $l$  represents the length of immersion in PBS, in this work, the  $l$  equals 1.5 cm.

### Stability testing of silver wire, gold wire and PGF electrodes

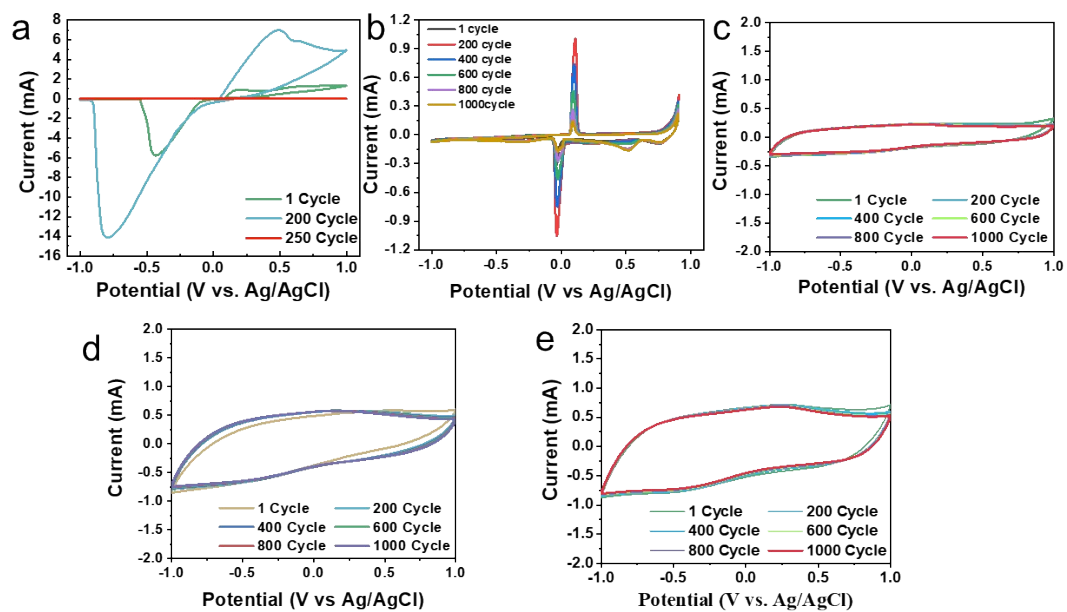

**Figure S4.** Long-term CV tests of the (a) silver wire, (b) gold wire, (c) GF, (d) PGF-10 and (e) PGF-30.

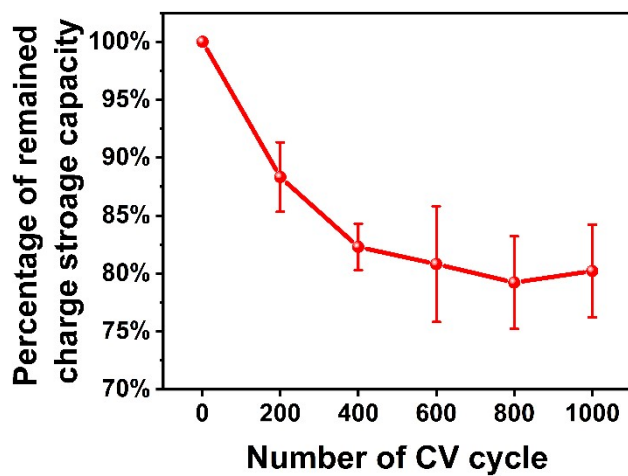

**Figure S5.** CSC of PGF-20 after 1000-cycle CV tests.
